# Supplementary material for: Drug repurposing: Antimicrobial and antibiofilm effects of MLS0315771 against Gram-positive bacteria
Source: Research Square preprint supplement (doi:10.21203/rs.3.rs-8617708/v1), 2026-01-30
Supplement: Supplementary file 1 [file 8bfc1d3c74d7374ca138299d.docx]

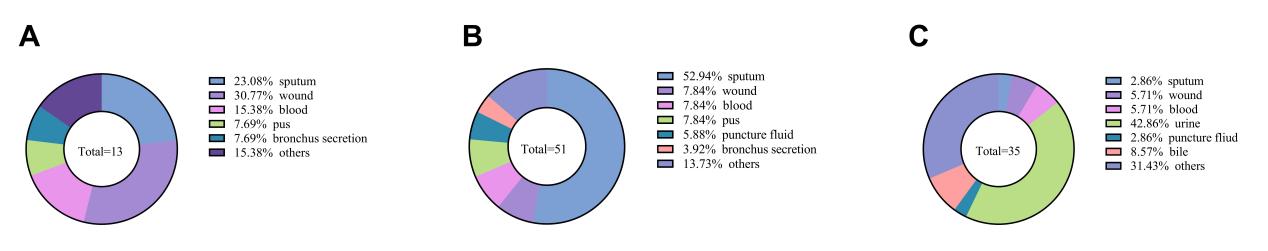


Figure S1. The sample type of clinical MSSA, MRSA and *E. faecalis* isolates.


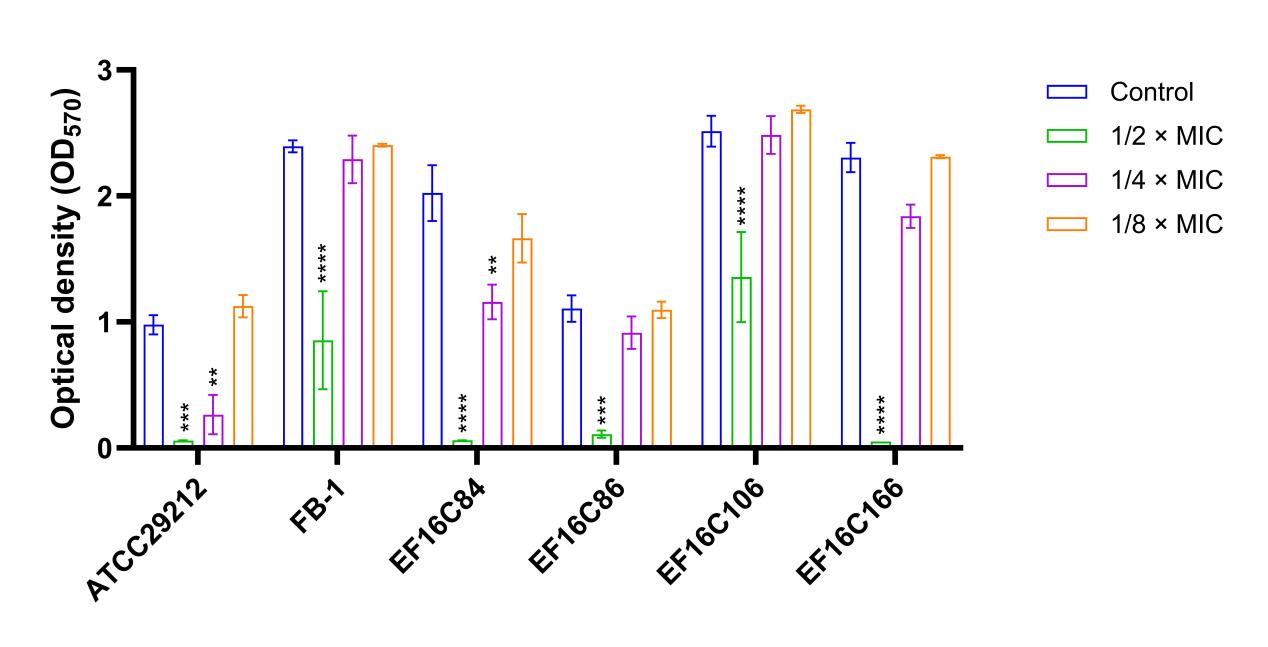


Figure S2. Antibiofilm activity of MLS0315771 against *E. faecium*. *E. faecium* isolates were tested for the inhibitory effect of MLS0315771 on the biofilm formation under different concentrations (1/8 ×, 1/4 ×, 1/2 × MIC).

Table S1. The MIC distribution of MLS0315771 against LZD-resistant and intermediate *E. faecalis*.

| Bacteria species | Clinical isolates | MLS0315771 MIC (μM) | LZD (μg/mL) |
| --- | --- | --- | --- |
| Standard strain | ATCC29212 | 12.5 (3.42 μg/mL) | 2 |
| OG1RF | 12.5 | 2 |
| LZD resistant  *E. faecalis* | FB-1 | 6.25 (1.71 μg/mL) | 8 |
| JXY | 12.5 | 8 |
| JB-2 | 6.25 | 8 |
| R3-LZD | 6.25 | 8 |
| TYY | 6.25 | 8 |
| EF16C3 | 6.25 | 16 |
| EF16C30 | 3.125 (0.86 μg/mL) | 8 |
| EF16C102 | 3.125 | 8 |
| EF16C272 | 6.25 | 8 |
| EF16C299 | 6.25 | 8 |
| EF16C340 | 12.5 | 8 |
| EF16C348 | 12.5 | 8 |
| EF16C359 | 3.125 | 8 |
| EF16C360 | 3.125 | 8 |
| LZD intermediate  *E. faecalis* | EF16C108 | 3.125 | 4 |
| EF16C112 | 6.25 | 4 |
| EF16C166 | 12.5 | 4 |
| EF16C289 | 12.5 | 4 |
| EF16C352 | 6.25 | 4 |

Table S3. The MIC distribution of membrane phospholipids against *S. aureus*.

| **MIC (μg/mL)** | **PC** | **PE** | **PG** | **CL** |
| --- | --- | --- | --- | --- |
| CHS101 | >128 | >128 | >128 | >128 |
| YUSA145 | >128 | >128 | >128 | >128 |

Table S4. The MIC distribution of MLS0315771 against *S. aureus* after exogenously supplementing membrane phospholipids.

| MLS0315771 MIC (μM) | | PC (μg/ml) | | PE (μg/ml) | | PG (μg/ml) | | CL (μg/ml) | |
| --- | --- | --- | --- | --- | --- | --- | --- | --- | --- |
| 64 | 16 | 64 | 16 | 64 | 16 | 64 | 16 |
| CHS101 | 6.25 | 12.5 | 12.5 | 12.5 | 6.25 | 6.25 | 6.25 | 12.5 | 6.25 |
| YUSA145 | 12.5 | 12.5 | 12.5 | 12.5 | 12.5 | 12.5 | 12.5 | 12.5 | 12.5 |

Table S5. The MIC distribution of MLS0315771 against WT and ΔClpx *S. aureus*.

| **Isolates** | **MIC (μM)** |
| --- | --- |
| SA113 | 6.25 |
| SA113 ΔClpx clone 1 | 12.5 |
| SA113 ΔClpx clone 2 | 12.5 |
| SA113 ΔClpx clone 3 | 12.5 |
| SA113 ΔClpx clone 4 | 12.5 |
| SA113 ΔClpx clone 5 | 12.5 |
| SA113 ΔClpx clone 6 | 12.5 |
