# Supplementary material for: Drug repurposing: Antimicrobial and antibiofilm effects of MLS0315771 against Gram-positive bacteria
Source: Research Square preprint supplement (doi:10.21203/rs.3.rs-8617708/v1), 2026-01-30
Supplement: Supplementary file 2 [file e2be6bcf6f31e6edcedf5a96.xlsx]

## Sheet: Tablib Dataset
Table S2. Protein quantification of significantly reduced or increased expression of YUSA145 after MLS0315771 treatment. Related to Figure 5.
Proteins were quantified based on the iTRAQ intensities of only fully tryptic peptides (both termini generated by trypsin digestion).
ID	FoldChange	Log2FoldChange	Uniprot	Genename	Biological Process	Cell Component	Molecular Function	KEGG Pathways	UNIPROT_URL	Transcription Factor
Q2FWP0	0.0496522	-4.332	Q2FWP0	SAOUHSC_02241	GO:0019835,cytolysis|GO:0051715,cytolysis in other organism|GO:0044364,disruption of cells of other organism|GO:0009987,cellular process|GO:0031640,killing of cells of other organism|GO:0044764,multi-organism cellular process|GO:0065007,biological regulation|GO:0009405,pathogenesis|GO:0001906,cell killing|GO:0065008,regulation of biological quality|GO:0035821,modification of morphology or physiol…	GO:0005576,extracellular region		sao05150,Staphylococcus aureus infection	http://www.uniprot.org/uniprot/Q2FWP0	False
Q2FWM8	0.0681567	-3.875	Q2FWM8	hld	GO:0001907,killing by symbiont of host cells|GO:0044004,disruption by symbiont of host cell|GO:0019835,cytolysis|GO:0051715,cytolysis in other organism|GO:0019836,hemolysis by symbiont of host erythrocytes|GO:0044364,disruption of cells of other organism|GO:0044179,hemolysis in other organism|GO:0044419,interspecies interaction between organisms|GO:0065007,biological regulation|GO:0051817,modific…	GO:0018995,host|GO:0044218,other organism cell membrane|GO:0044217,other organism part|GO:0044216,other organism cell|GO:0020002,host cell plasma membrane|GO:0033643,host cell part|GO:0016021,integral component of membrane|GO:0016020,membrane|GO:0044279,other organism membrane|GO:0043657,host cell|GO:0033644,host cell membrane|GO:0005576,extracellular region|GO:0044425,membrane part|GO:0044215,ot…			http://www.uniprot.org/uniprot/Q2FWM8	False
Q2FYJ7	0.102309	-3.289	Q2FYJ7	SAOUHSC_01443	GO:0090502,RNA phosphodiester bond hydrolysis, endonucleolytic|GO:0016070,RNA metabolic process|GO:0090501,RNA phosphodiester bond hydrolysis|GO:0044260,cellular macromolecule metabolic process|GO:0006139,nucleobase-containing compound metabolic process|GO:0009987,cellular process|GO:0006725,cellular aromatic compound metabolic process|GO:0044237,cellular metabolic process|GO:0043170,macromolecul…		GO:0016787,hydrolase activity|GO:0003824,catalytic activity|GO:0004518,nuclease activity|GO:0004519,endonuclease activity|GO:0004540,ribonuclease activity|GO:0004521,endoribonuclease activity|GO:0004523,RNA-DNA hybrid ribonuclease activity|GO:0016893,endonuclease activity, active with either ribo- or deoxyribonucleic acids and producing 5'-phosphomonoesters|GO:0016891,endoribonuclease activity, p…	sao03030,DNA replication	http://www.uniprot.org/uniprot/Q2FYJ7	False
Q2FWN9	0.122512	-3.029	Q2FWN9	SAOUHSC_02243	GO:0019835,cytolysis|GO:0051715,cytolysis in other organism|GO:0044364,disruption of cells of other organism|GO:0009987,cellular process|GO:0031640,killing of cells of other organism|GO:0044764,multi-organism cellular process|GO:0065007,biological regulation|GO:0009405,pathogenesis|GO:0001906,cell killing|GO:0065008,regulation of biological quality|GO:0035821,modification of morphology or physiol…	GO:0005576,extracellular region		sao05150,Staphylococcus aureus infection	http://www.uniprot.org/uniprot/Q2FWN9	False
Q2G1G2	0.144686	-2.789	Q2G1G2	SAOUHSC_00162	GO:0090304,nucleic acid metabolic process|GO:0090305,nucleic acid phosphodiester bond hydrolysis|GO:0034641,cellular nitrogen compound metabolic process|GO:0006807,nitrogen compound metabolic process|GO:0044355,clearance of foreign intracellular DNA|GO:1901360,organic cyclic compound metabolic process|GO:0006139,nucleobase-containing compound metabolic process|GO:0006304,DNA modification|GO:00442…		GO:0035639,purine ribonucleoside triphosphate binding|GO:0005488,binding|GO:0003676,nucleic acid binding|GO:0003677,DNA binding|GO:0016888,endodeoxyribonuclease activity, producing 5'-phosphomonoesters|GO:0043167,ion binding|GO:1901363,heterocyclic compound binding|GO:0001883,purine nucleoside binding|GO:0001882,nucleoside binding|GO:0043168,anion binding|GO:0097367,carbohydrate derivative bindin…		http://www.uniprot.org/uniprot/Q2G1G2	False
Q2FZG8	0.198059	-2.336	Q2FZG8	SAOUHSC_01036					http://www.uniprot.org/uniprot/Q2FZG8	False
Q2G1U6	0.225156	-2.151	Q2G1U6	spxA	GO:0009892,negative regulation of metabolic process|GO:0080090,regulation of primary metabolic process|GO:0009890,negative regulation of biosynthetic process|GO:0031327,negative regulation of cellular biosynthetic process|GO:0031326,regulation of cellular biosynthetic process|GO:0031324,negative regulation of cellular metabolic process|GO:0031323,regulation of cellular metabolic process|GO:009030…	GO:0005737,cytoplasm|GO:0044464,cell part|GO:0005623,cell|GO:0005622,intracellular|GO:0044424,intracellular part			http://www.uniprot.org/uniprot/Q2G1U6	False
Q2FV10	0.234718	-2.091	Q2FV10	SAOUHSC_02933	GO:0042398,cellular modified amino acid biosynthetic process|GO:0044249,cellular biosynthetic process|GO:0034641,cellular nitrogen compound metabolic process|GO:0006807,nitrogen compound metabolic process|GO:0044281,small molecule metabolic process|GO:1901566,organonitrogen compound biosynthetic process|GO:0044699,single-organism process|GO:0019285,glycine betaine biosynthetic process from cholin…		GO:0043169,cation binding|GO:0008802,betaine-aldehyde dehydrogenase activity|GO:0004029,aldehyde dehydrogenase (NAD) activity|GO:0016620,oxidoreductase activity, acting on the aldehyde or oxo group of donors, NAD or NADP as acceptor|GO:0043167,ion binding|GO:0003824,catalytic activity|GO:0016903,oxidoreductase activity, acting on the aldehyde or oxo group of donors|GO:0005488,binding|GO:0046872,m…	sao00260,Glycine, serine and threonine metabolism|sao01100,Metabolic pathways	http://www.uniprot.org/uniprot/Q2FV10	False
Q2G2J2	0.239816	-2.06	Q2G2J2	ssaA2	GO:0009405,pathogenesis|GO:0008152,metabolic process|GO:0051704,multi-organism process|GO:0044419,interspecies interaction between organisms	GO:0005576,extracellular region	GO:0016787,hydrolase activity|GO:0003824,catalytic activity		http://www.uniprot.org/uniprot/Q2G2J2	False
Q2G222	0.239982	-2.059	Q2G222	SAOUHSC_02979	GO:0008152,metabolic process	GO:0005576,extracellular region	GO:0016787,hydrolase activity|GO:0004040,amidase activity|GO:0016810,hydrolase activity, acting on carbon-nitrogen (but not peptide) bonds|GO:0016811,hydrolase activity, acting on carbon-nitrogen (but not peptide) bonds, in linear amides|GO:0003824,catalytic activity		http://www.uniprot.org/uniprot/Q2G222	False
Q2FWY2	0.258816	-1.95	Q2FWY2	SAOUHSC_02139	GO:0008152,metabolic process|GO:0044248,cellular catabolic process|GO:0072529,pyrimidine-containing compound catabolic process|GO:0034641,cellular nitrogen compound metabolic process|GO:0006807,nitrogen compound metabolic process|GO:0044281,small molecule metabolic process|GO:0046113,nucleobase catabolic process|GO:0072524,pyridine-containing compound metabolic process|GO:0044699,single-organism …	GO:0005737,cytoplasm|GO:0044464,cell part|GO:0005623,cell|GO:0005622,intracellular|GO:0044424,intracellular part	GO:0016787,hydrolase activity|GO:0003824,catalytic activity|GO:0008936,nicotinamidase activity|GO:0016810,hydrolase activity, acting on carbon-nitrogen (but not peptide) bonds|GO:0016811,hydrolase activity, acting on carbon-nitrogen (but not peptide) bonds, in linear amides		http://www.uniprot.org/uniprot/Q2FWY2	False
Q2G189	0.270181	-1.888	Q2G189	esxA		GO:0005576,extracellular region			http://www.uniprot.org/uniprot/Q2G189	False
Q2FZA9	2.36035	1.239	Q2FZA9	arcC1	GO:0046434,organophosphate catabolic process|GO:0016310,phosphorylation|GO:0019752,carboxylic acid metabolic process|GO:0044248,cellular catabolic process|GO:0034641,cellular nitrogen compound metabolic process|GO:0006807,nitrogen compound metabolic process|GO:0044281,small molecule metabolic process|GO:0009064,glutamine family amino acid metabolic process|GO:0044699,single-organism process|GO:00…	GO:0005737,cytoplasm|GO:0044464,cell part|GO:0005623,cell|GO:0005622,intracellular|GO:0044424,intracellular part|GO:0005829,cytosol|GO:0044444,cytoplasmic part	GO:0008804,carbamate kinase activity|GO:0035639,purine ribonucleoside triphosphate binding|GO:0005488,binding|GO:0000166,nucleotide binding|GO:1901363,heterocyclic compound binding|GO:1901265,nucleoside phosphate binding|GO:0001882,nucleoside binding|GO:0043168,anion binding|GO:0043167,ion binding|GO:0016740,transferase activity|GO:0001883,purine nucleoside binding|GO:0032549,ribonucleoside bindi…	sao01200,Carbon metabolism|sao01120,Microbial metabolism in diverse environments|sao00230,Purine metabolism|sao00220,Arginine biosynthesis|sao01100,Metabolic pathways|sao00910,Nitrogen metabolism	http://www.uniprot.org/uniprot/Q2FZA9	False
Q9RFJ6	2.46741	1.303	Q9RFJ6	rot	GO:0080090,regulation of primary metabolic process|GO:0019222,regulation of metabolic process|GO:0031326,regulation of cellular biosynthetic process|GO:0031323,regulation of cellular metabolic process|GO:0090304,nucleic acid metabolic process|GO:0044249,cellular biosynthetic process|GO:0034641,cellular nitrogen compound metabolic process|GO:0006807,nitrogen compound metabolic process|GO:0034645,c…		GO:0003700,transcription factor activity, sequence-specific DNA binding|GO:0097159,organic cyclic compound binding|GO:0005488,binding|GO:0003676,nucleic acid binding|GO:0003677,DNA binding|GO:1901363,heterocyclic compound binding|GO:0001071,nucleic acid binding transcription factor activity|GO:0044212,transcription regulatory region DNA binding|GO:0000975,regulatory region DNA binding|GO:0001067,…		http://www.uniprot.org/uniprot/Q9RFJ6	True
Q2G1P3	2.54912	1.35	Q2G1P3	SAOUHSC_00061	GO:0044238,primary metabolic process|GO:0006631,fatty acid metabolic process|GO:0006629,lipid metabolic process|GO:0006082,organic acid metabolic process|GO:0044237,cellular metabolic process|GO:0009987,cellular process|GO:0044710,single-organism metabolic process|GO:0019752,carboxylic acid metabolic process|GO:0032787,monocarboxylic acid metabolic process|GO:0071704,organic substance metabolic p…		GO:0043168,anion binding|GO:0050662,coenzyme binding|GO:0050660,flavin adenine dinucleotide binding|GO:0016835,carbon-oxygen lyase activity|GO:0016836,hydro-lyase activity|GO:1901363,heterocyclic compound binding|GO:0000166,nucleotide binding|GO:0036094,small molecule binding|GO:0003824,catalytic activity|GO:0050151,oleate hydratase activity|GO:1901265,nucleoside phosphate binding|GO:0097159,orga…		http://www.uniprot.org/uniprot/Q2G1P3	False
Q2FVP1	2.7283	1.448	Q2FVP1	SAOUHSC_02661	GO:0006810,transport|GO:0055085,transmembrane transport|GO:0009987,cellular process|GO:0008643,carbohydrate transport|GO:0009401,phosphoenolpyruvate-dependent sugar phosphotransferase system|GO:0044765,single-organism transport|GO:0044763,single-organism cellular process|GO:0044699,single-organism process|GO:0008152,metabolic process|GO:0071702,organic substance transport|GO:0051179,localization|…	GO:0016021,integral component of membrane|GO:0016020,membrane|GO:0044464,cell part|GO:0005623,cell|GO:0071944,cell periphery|GO:0005886,plasma membrane|GO:0044425,membrane part|GO:0031224,intrinsic component of membrane	GO:0022891,substrate-specific transmembrane transporter activity|GO:0022892,substrate-specific transporter activity|GO:0008982,protein-N(PI)-phosphohistidine-sugar phosphotransferase activity|GO:0003824,catalytic activity|GO:1901476,carbohydrate transporter activity|GO:0005215,transporter activity|GO:0016740,transferase activity|GO:0016773,phosphotransferase activity, alcohol group as acceptor|GO…	sao00500,Starch and sucrose metabolism|sao02060,Phosphotransferase system (PTS)	http://www.uniprot.org/uniprot/Q2FVP1	False
Q2FUX8	2.77406	1.472	Q2FUX8	argF	GO:0006591,ornithine metabolic process|GO:0019752,carboxylic acid metabolic process|GO:0044249,cellular biosynthetic process|GO:0006807,nitrogen compound metabolic process|GO:0044281,small molecule metabolic process|GO:0044283,small molecule biosynthetic process|GO:0009064,glutamine family amino acid metabolic process|GO:0044699,single-organism process|GO:1901576,organic substance biosynthetic pr…	GO:0005737,cytoplasm|GO:0044464,cell part|GO:0005623,cell|GO:0005622,intracellular|GO:0044424,intracellular part	GO:0043168,anion binding|GO:0003824,catalytic activity|GO:0043177,organic acid binding|GO:0031406,carboxylic acid binding|GO:0043167,ion binding|GO:0036094,small molecule binding|GO:0016743,carboxyl- or carbamoyltransferase activity|GO:0016740,transferase activity|GO:0016741,transferase activity, transferring one-carbon groups|GO:0005488,binding|GO:0004585,ornithine carbamoyltransferase activity|…	sao01110,Biosynthesis of secondary metabolites|sao01230,Biosynthesis of amino acids|sao01100,Metabolic pathways|sao00220,Arginine biosynthesis|sao01130,Biosynthesis of antibiotics	http://www.uniprot.org/uniprot/Q2FUX8	False
Q2G1D8	2.77599	1.473	Q2G1D8	pflB	GO:0044238,primary metabolic process|GO:0044710,single-organism metabolic process|GO:0005975,carbohydrate metabolic process|GO:0005996,monosaccharide metabolic process|GO:0019318,hexose metabolic process|GO:0071704,organic substance metabolic process|GO:0008152,metabolic process|GO:0044723,single-organism carbohydrate metabolic process|GO:0006006,glucose metabolic process|GO:0044699,single-organi…	GO:0005737,cytoplasm|GO:0044464,cell part|GO:0005623,cell|GO:0005622,intracellular|GO:0044424,intracellular part	GO:0008861,formate C-acetyltransferase activity|GO:0003824,catalytic activity|GO:0016407,acetyltransferase activity|GO:0016740,transferase activity|GO:0016746,transferase activity, transferring acyl groups|GO:0016747,transferase activity, transferring acyl groups other than amino-acyl groups|GO:0016453,C-acetyltransferase activity|GO:0016408,C-acyltransferase activity	sao00620,Pyruvate metabolism|sao01100,Metabolic pathways|sao00650,Butanoate metabolism|sao00640,Propanoate metabolism	http://www.uniprot.org/uniprot/Q2G1D8	False
Q2G0U0	2.94037	1.556	Q2G0U0	SAOUHSC_00437	GO:0015766,disaccharide transport|GO:0016310,phosphorylation|GO:0008643,carbohydrate transport|GO:0034219,carbohydrate transmembrane transport|GO:0044699,single-organism process|GO:0051179,localization|GO:0071702,organic substance transport|GO:0009987,cellular process|GO:0015772,oligosaccharide transport|GO:0015771,trehalose transport|GO:0006810,transport|GO:0009401,phosphoenolpyruvate-dependent …	GO:0016021,integral component of membrane|GO:0016020,membrane|GO:0044464,cell part|GO:0005623,cell|GO:0071944,cell periphery|GO:0005886,plasma membrane|GO:0044425,membrane part|GO:0031224,intrinsic component of membrane	GO:0022891,substrate-specific transmembrane transporter activity|GO:0022892,substrate-specific transporter activity|GO:0015574,trehalose transmembrane transporter activity|GO:0008982,protein-N(PI)-phosphohistidine-sugar phosphotransferase activity|GO:0051119,sugar transmembrane transporter activity|GO:1901476,carbohydrate transporter activity|GO:0005215,transporter activity|GO:0003824,catalytic a…	sao00500,Starch and sucrose metabolism|sao02060,Phosphotransferase system (PTS)	http://www.uniprot.org/uniprot/Q2G0U0	False
Q2FVP0	3.0887	1.627	Q2FVP0	SAOUHSC_02662	GO:0006810,transport|GO:0055085,transmembrane transport|GO:0009987,cellular process|GO:0008643,carbohydrate transport|GO:0009401,phosphoenolpyruvate-dependent sugar phosphotransferase system|GO:0044765,single-organism transport|GO:0044763,single-organism cellular process|GO:0044699,single-organism process|GO:0008152,metabolic process|GO:0071702,organic substance transport|GO:0051179,localization|…	GO:0016021,integral component of membrane|GO:0016020,membrane|GO:0044464,cell part|GO:0005623,cell|GO:0071944,cell periphery|GO:0005886,plasma membrane|GO:0044425,membrane part|GO:0031224,intrinsic component of membrane	GO:0022891,substrate-specific transmembrane transporter activity|GO:0022892,substrate-specific transporter activity|GO:0008982,protein-N(PI)-phosphohistidine-sugar phosphotransferase activity|GO:0003824,catalytic activity|GO:1901476,carbohydrate transporter activity|GO:0005215,transporter activity|GO:0016740,transferase activity|GO:0016773,phosphotransferase activity, alcohol group as acceptor|GO…	sao00500,Starch and sucrose metabolism|sao02060,Phosphotransferase system (PTS)	http://www.uniprot.org/uniprot/Q2FVP0	False
Q2FVA2	3.6731	1.877	Q2FVA2	SAOUHSC_02831	GO:0008152,metabolic process		GO:0016787,hydrolase activity|GO:0003824,catalytic activity		http://www.uniprot.org/uniprot/Q2FVA2	False
Q2G082	3.77899	1.918	Q2G082	SAOUHSC_00738	GO:0006857,oligopeptide transport|GO:0042886,amide transport|GO:0006810,transport|GO:0044765,single-organism transport|GO:0071705,nitrogen compound transport|GO:0015833,peptide transport|GO:1902578,single-organism localization|GO:0071702,organic substance transport|GO:0051234,establishment of localization|GO:0051179,localization|GO:0044699,single-organism process	GO:0044425,membrane part|GO:0016021,integral component of membrane|GO:0016020,membrane|GO:0031224,intrinsic component of membrane	GO:0015197,peptide transporter activity|GO:0022892,substrate-specific transporter activity|GO:0005215,transporter activity		http://www.uniprot.org/uniprot/Q2G082	False
Q2FYC7	5.4189	2.438	Q2FYC7	SAOUHSC_01537					http://www.uniprot.org/uniprot/Q2FYC7	False
Q2FUX0	5.45659	2.448	Q2FUX0	SAOUHSC_02975	GO:0008643,carbohydrate transport|GO:0034219,carbohydrate transmembrane transport|GO:0044699,single-organism process|GO:0015992,proton transport|GO:0008645,hexose transport|GO:0051179,localization|GO:0006810,transport|GO:0071702,organic substance transport|GO:0015672,monovalent inorganic cation transport|GO:0006818,hydrogen transport|GO:0006812,cation transport|GO:0006811,ion transport|GO:0009987…	GO:0016021,integral component of membrane|GO:0016020,membrane|GO:0044464,cell part|GO:0005623,cell|GO:0071944,cell periphery|GO:0005886,plasma membrane|GO:0044425,membrane part|GO:0031224,intrinsic component of membrane	GO:0015291,secondary active transmembrane transporter activity|GO:0015293,symporter activity|GO:1901476,carbohydrate transporter activity|GO:0015149,hexose transmembrane transporter activity|GO:0016740,transferase activity|GO:0005402,cation:sugar symporter activity|GO:0015145,monosaccharide transmembrane transporter activity|GO:0015144,carbohydrate transmembrane transporter activity|GO:0022804,ac…	sao01120,Microbial metabolism in diverse environments|sao01100,Metabolic pathways|sao02060,Phosphotransferase system (PTS)|sao00051,Fructose and mannose metabolism	http://www.uniprot.org/uniprot/Q2FUX0	False
Q2G206	6.06707	2.601	Q2G206	SAOUHSC_02806	GO:0015725,gluconate transport|GO:1903825,organic acid transmembrane transport|GO:0051179,localization|GO:0034219,carbohydrate transmembrane transport|GO:0044699,single-organism process|GO:0008643,carbohydrate transport|GO:0071702,organic substance transport|GO:0035429,gluconate transmembrane transport|GO:0009987,cellular process|GO:0015718,monocarboxylic acid transport|GO:0015849,organic acid tr…	GO:0016020,membrane|GO:0031226,intrinsic component of plasma membrane|GO:0016021,integral component of membrane|GO:0044464,cell part|GO:0005623,cell|GO:0071944,cell periphery|GO:0005887,integral component of plasma membrane|GO:0005886,plasma membrane|GO:0044425,membrane part|GO:0044459,plasma membrane part|GO:0031224,intrinsic component of membrane	GO:0022891,substrate-specific transmembrane transporter activity|GO:0022892,substrate-specific transporter activity|GO:0005342,organic acid transmembrane transporter activity|GO:0015128,gluconate transmembrane transporter activity|GO:0008028,monocarboxylic acid transmembrane transporter activity|GO:0005215,transporter activity|GO:0008509,anion transmembrane transporter activity|GO:1901476,carbohy…		http://www.uniprot.org/uniprot/Q2G206	False
Q2FV24	15.0219	3.909	Q2FV24	SAOUHSC_02915	GO:0044238,primary metabolic process|GO:0019538,protein metabolic process|GO:0043170,macromolecule metabolic process|GO:0071704,organic substance metabolic process|GO:0008152,metabolic process|GO:0006508,proteolysis|GO:1901564,organonitrogen compound metabolic process|GO:0006807,nitrogen compound metabolic process		GO:0004177,aminopeptidase activity|GO:0016787,hydrolase activity|GO:0003824,catalytic activity|GO:0008239,dipeptidyl-peptidase activity|GO:0008238,exopeptidase activity|GO:0070011,peptidase activity, acting on L-amino acid peptides|GO:0008233,peptidase activity		http://www.uniprot.org/uniprot/Q2FV24	False
Q2FVP4	43.865	5.455	Q2FVP4	SAOUHSC_02658		GO:0044425,membrane part|GO:0016021,integral component of membrane|GO:0016020,membrane|GO:0031224,intrinsic component of membrane			http://www.uniprot.org/uniprot/Q2FVP4	False
